# Supplementary material for: Modulation of copper deficiency responses by diurnal and circadian rhythms in Arabidopsis thaliana
Source: PubMed Central journal article supplement (PMC4682440; doi:10.1093/jxb/erv474), 2015-10-29
Supplement: supp_erv474_supplementary_figures_S1_S5-Tables_S1_S4.pdf [file supp_erv474_supplementary_figures_S1_S5-Tables_S1_S4.pdf]

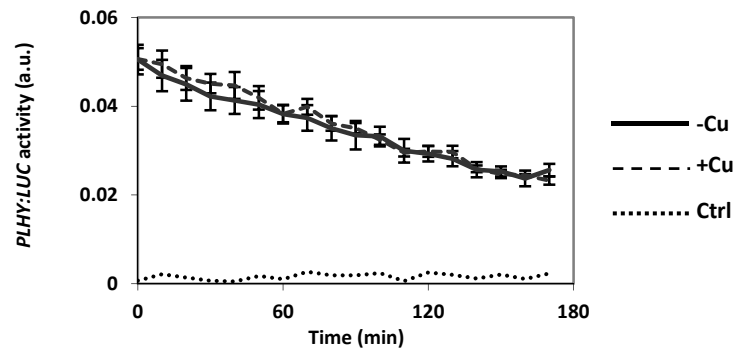

**Fig. S1.** Luciferase activity at different Cu concentrations. Total protein was extracted from 7 day-old *PLHY:LUC* seedlings grown under Cu deficiency ( $\frac{1}{2}$  MS; -Cu). Kinetic measurements were performed after adding  $10 \mu\text{M}$   $\text{CuSO}_4$  (Cu excess; +Cu) and a constant amount of D-luciferin ( $0.3 \text{ mg/mL}$ ). The activity was recorded every 10 min. Extract without substrate was used as a negative control (Ctrl). a.u.= arbitrary units.

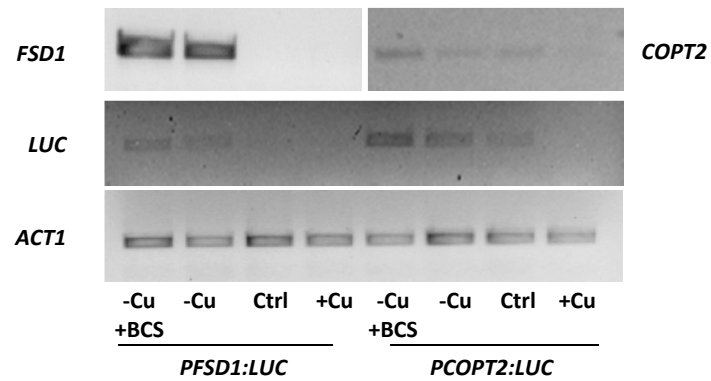

**Fig. S2.** *FSD1*, *COPT2* and *LUC* gene expression at different Cu contents. Six day-old *PFSD1:LUC* and *PCOPT2:LUC* seedlings were grown in severe Cu deficiency (½ MS with 50 µM BCS; -Cu + BCS), Cu deficiency (½ MS; -Cu), sufficiency (½ MS with 1 µM µM CuSO<sub>4</sub>; Ctrl) or in Cu excess (½ MS with 10 µM µM CuSO<sub>4</sub>; +Cu) in LDHC cycles. Samples were collected at 4 h after the onset of the light cycle and *LUC* and *FSD1* gene expression were analyzed by sqPCR. *ACT1* expression was used as loading control.

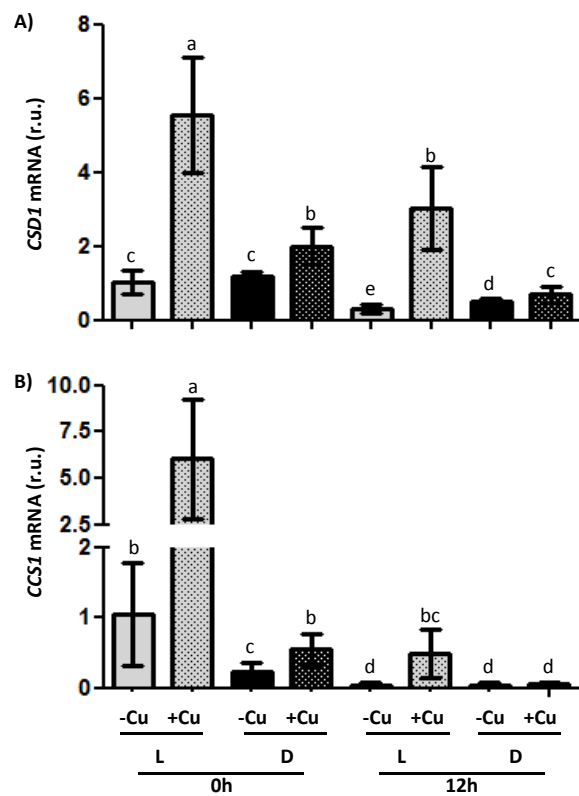

**Fig. S3.** Regulation of *CSD1* and *CCS1* gene expression by Cu and light conditions. The relative expression was determined in the same conditions shown in Fig. 4. Means with a different letter are significantly different ( $P < 0.05$ ). r.u. = relative units.

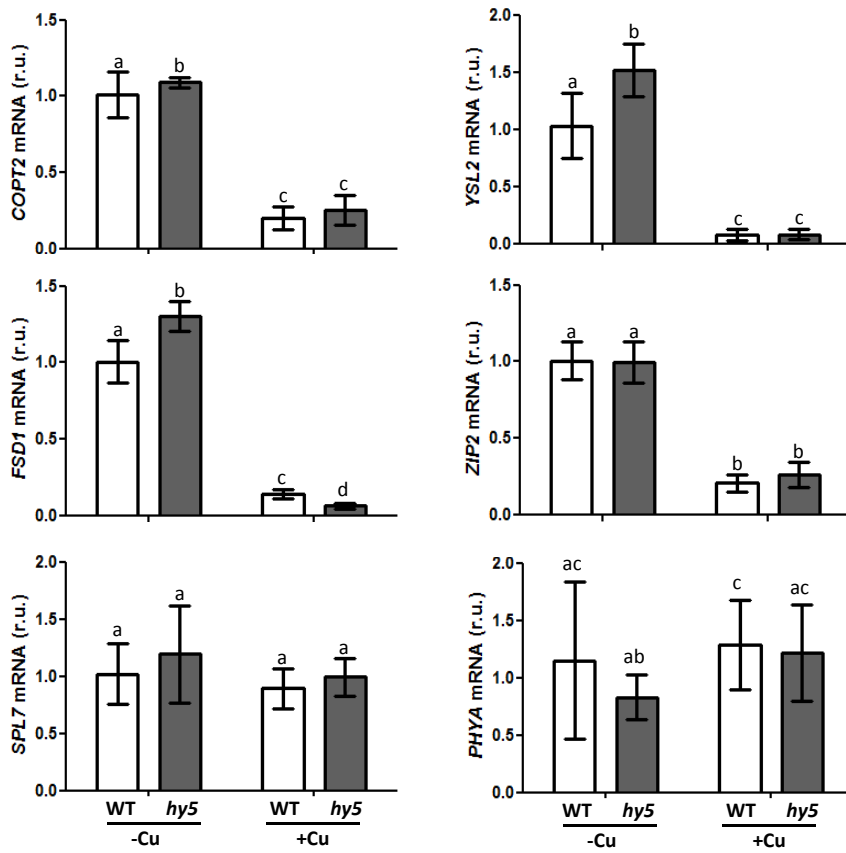

**Fig. S4.** Regulation of gene expression by Cu in the *hy5* mutant. The relative expression of the *COPT2*, *FSD1*, *SPL7*, *YSL2*, *ZIP2* and *PHYA* genes was determined by qPCR in 7 day-old WT seedlings grown under Cu deficiency (½ MS; -Cu, white bars) or Cu excess (½ MS with 10 μM CuSO<sub>4</sub>; +Cu, grey bars). The *UBQ10* gene was used as reference. mRNA levels are expressed as relative units (r.u.). The bars represent the mean ± SD of 3 replicates. Means with a different letter are significantly different ( $P < 0.05$ ).

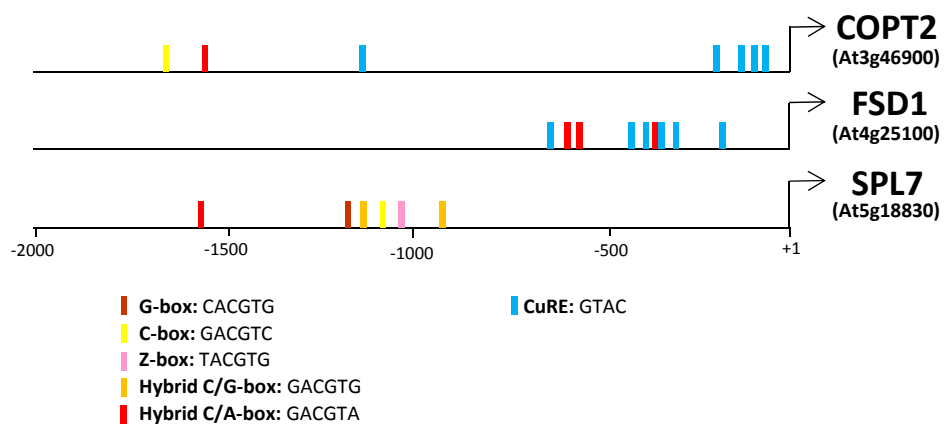

**Fig. S5.** Sequence analysis of the *COPT2*, *FSD1* and *SPL7* promoters for putative HY5 and SPL7 recognized sites. Positions of the *cis* regulatory elements are marked in different colors as indicated in figure legend. Putative CuRE elements bound by SPL7 (Yamasaki *et al.*, 2009) and different HY5 bound elements (Song *et al.*, 2008) are shown.

**Table S1.** Analysis of the peak time values under different circadian and diurnal oscillatory conditions for the genes regulated under Cu deficiency conditions. The locus MIPS code (<http://www.arabidopsis.org>) and the phases under different oscillatory conditions (<http://diurnal.mocklerlab.org>) are shown. D: dark, L: light, H: hot (22°C), C: cold (12°C). Letters between brackets mean entrainment conditions before constant conditions.

|                     |           | Circadian |            |            |          |          | Diurnal |         |         |          |      |      |      |
|---------------------|-----------|-----------|------------|------------|----------|----------|---------|---------|---------|----------|------|------|------|
| Gene                | Locus     | DD(DDHC)  | LL23(LDHH) | LL12(LDHH) | LL(LDHC) | LL(LLHC) | LDHH_SM | LDHH_ST | longday | shortday | LDHC | LLHC | Peak |
| <i>COPT2</i>        | AT3G46900 |           | 20         | 22         |          |          |         | 21      | 0       | 22       |      |      | 21.8 |
| <i>FSD1</i>         | AT4G25100 |           | 6          |            |          |          |         | 1       |         |          |      |      | 3.5  |
| <i>SPL7</i>         | AT5G18830 |           |            |            |          |          | 19      |         |         | 22       | 23   | 22   | 21.5 |
| <i>ZIP2</i>         | AT5G59520 |           |            |            |          |          |         |         |         | 19       |      |      | 19   |
| <i>CSD1</i>         | AT1G08830 | 20        |            | 6          |          | 23       |         |         |         |          |      |      | 0.3  |
| <i>CCS</i>          | AT1G12520 | 23        |            |            |          |          | 22      | 21      | 23      | 18       |      |      | 21.4 |
| <i>LHY</i>          | AT1G01060 | 0         | 22         | 1          | 1        | 2        | 0       | 23      | 1       | 23       | 23   | 2    | 0.2  |
| <i>CAS</i>          | AT5G23060 |           | 21         | 23         |          | 3        | 2       | 23      | 2       | 1        | 2    | 2    | 0.7  |
| <i>YSL2</i>         | AT5G24380 |           | 19         | 21         |          |          |         |         |         | 4        |      | 21   | 22.3 |
| <i>SMC6B</i>        | AT5G61460 |           |            |            |          |          |         |         | 1       | 10       |      | 18   | 18   |
| <i>IRT1</i>         | AT4G19690 |           |            | 1          | 4        |          |         |         | 23      |          |      |      | 1.0  |
| <i>ACA1</i>         | AT3G52720 |           | 19         |            | 22       | 23       | 1       | 0       | 21      | 21       | 1    |      | 22.5 |
| <i>TIR-NBS-like</i> | AT3G04210 |           |            |            |          |          |         | 16      | 21      |          | 7    |      | 22.7 |
| <i>CYP83A1</i>      | AT4G13770 |           |            | 7          |          | 22       | 8       | 8       | 9       | 6        | 8    | 23   | 5.4  |
| <i>GSTF11</i>       | AT3G03190 |           |            |            |          |          | 8       | 10      |         | 6        |      | 0    | 6    |
| <i>BCAT4</i>        | AT3G19710 |           |            |            |          |          | 7       | 8       | 7       | 6        |      | 3    | 6.2  |
| <i>UGT78D2</i>      | AT5G17050 | 21        | 19         | 22         | 23       | 23       |         | 19      |         | 5        | 22   | 21   | 22.1 |
| <i>EXPA8</i>        | AT2G40610 |           | 4          | 6          | 6        |          |         | 0       |         | 23       | 5    | 8    | 4.0  |
| <i>Aux resp</i>     | AT1G29440 |           | 1          | 5          | 3        | 3        | 3       | 1       | 3       | 23       | 3    | 6    | 2.6  |
| <i>COPT1</i>        | AT5G59030 |           |            |            |          |          | 21      | 21      | 22      | 22       |      |      | 21.5 |
| <i>CCH</i>          | AT3G56240 |           |            |            |          |          |         | 0       |         | 20       |      |      | 22   |
| <i>CSD2</i>         | AT2G28190 |           | 15         | 7          |          | 23       |         |         |         |          |      | 0    | 17.3 |

**Table S2.** Primers used for cloning the *FSD1* and *COPT2* promoters. The restriction site is indicated *in italics* in the sequence.

| <b>Name</b>                | <b>Sequence (5'-)</b>               |
|----------------------------|-------------------------------------|
| <i>COPT2-1200F-HindIII</i> | GTGGTGTTAAAGCTTTTGCAACAA            |
| <i>COPT2-ATG-R-HindIII</i> | CATAAGCTTGATACTAATGTTAATAGGGTTATGAT |
| <i>FSD1 HindIII F</i>      | TTTAAGCTTGGAGTGAAGCTATATATA         |
| <i>FSD1 HindIII R</i>      | TTTAAGCTTAGCAGCCATTCTTTGTAATTGA     |

**Table S3.** Oligonucleotides used in sqPCR.

| <b>Gene Name</b>  | <b>Sequence (5'-)</b>     |
|-------------------|---------------------------|
| <i>ACTINARA1A</i> | GGCGATGAAGCTCAATCCAAC     |
| <i>ACTINARA1B</i> | GGTCACGACCAGCAAGATCAAGACG |
| <i>FSD1 rt F1</i> | GCTTCAAGTGCTGTCACC        |
| <i>FSD1 rt R1</i> | CAAGCCAGGCCAGCCAG         |
| <i>LUC-F</i>      | GGAAGACGCCAAAAACAT        |
| <i>LUC-R</i>      | GTTTTGTCACGATCAAAGGA      |
| <i>COPT2-F</i>    | ACGTGTCAGTGGCTCAACC       |
| <i>COPT2-R</i>    | GACGGCGGAAGAAGCTCGGCGG    |



**Table S4.** Oligonucleotides used in qPCR.

| Gene Name    | Sequence (5'-)            |                         |
|--------------|---------------------------|-------------------------|
|              | forward                   | reverse                 |
| <i>COPT2</i> | CCTTTCGTATTTGGTGATGCT     | AAACACCTGCGTTAAAGGAC    |
| <i>CCS</i>   | TCTCCACGTCTCTGGGACTTT     | AGCTGAGGCATGGCTCGAT     |
| <i>CSD1</i>  | CATCATTGGTCTCCAGGGCT      | GACCTCCTTATTACATCAAT    |
| <i>FSD1</i>  | ACCGAAGACCAGATTACATA      | TGGCACTTACAGTTCCCAA     |
| <i>SPL7</i>  | CAGGCAGACTGTTACCAGA       | AGTTTGACGGGACCTGAATG    |
| <i>UBQ10</i> | TAATCCCTGATGAATAAGTGTCTAC | AAAACGAAGCGATGATAAAGAAG |
| <i>ZIP2</i>  | CGCTTGAGAAAACCTATGGA      | CGACACCTATGGGACTCGAT    |
| <i>HY5</i>   | GTTTGGAGGAGAAGCTGTCTG     | TCTTGCTTGCTGAGCTGAAA    |
| <i>PHYA</i>  | GTTACAAAACCTGGGCTGGA      | ATGTTGGCCATGACTGCAA     |
| <i>YSL2</i>  | TCTTATAAATGGATTCATACTA    | AATGCCCAAAAGAACTCAAA    |
| <i>LHY</i>   | TCGGCCTCTTCTCACAGTT       | ACACCCGAGCAATTCTCATC    |
| <i>CCA1</i>  | GTTGCAGCTGCTAGTGCTTG      | GAAGATCGAGCCTTTGATGC    |
| <i>TOC1</i>  | TGATCTCCAATGGCTAAGG       | ACTTCGTCTTGCTCGACAT     |
| <i>GI</i>    | GCATCTAGTTGCTGGCCTTC      | AGCTCGAAGGAGTCCACAA     |
